# Supplementary material for: Glycogen shortage during fasting triggers liver–brain–adipose neurocircuitry to facilitate fat utilization
Source: PubMed Central journal article supplement — Nat Commun. 2013 Aug 13;4:2316. doi: 10.1038/ncomms3316 (PMC3753545; doi:10.1038/ncomms3316), 2013-08-13
Supplement: ncomms3316-s1.pdf [file ncomms3316-s1.pdf]

## **Supplementary Information**

**Glycogen shortage during fasting triggers liver-brain-adipose  
neurocircuitry to facilitate fat utilization**

## Liver-Brain-Adipose neurocircuitry

### Starvation

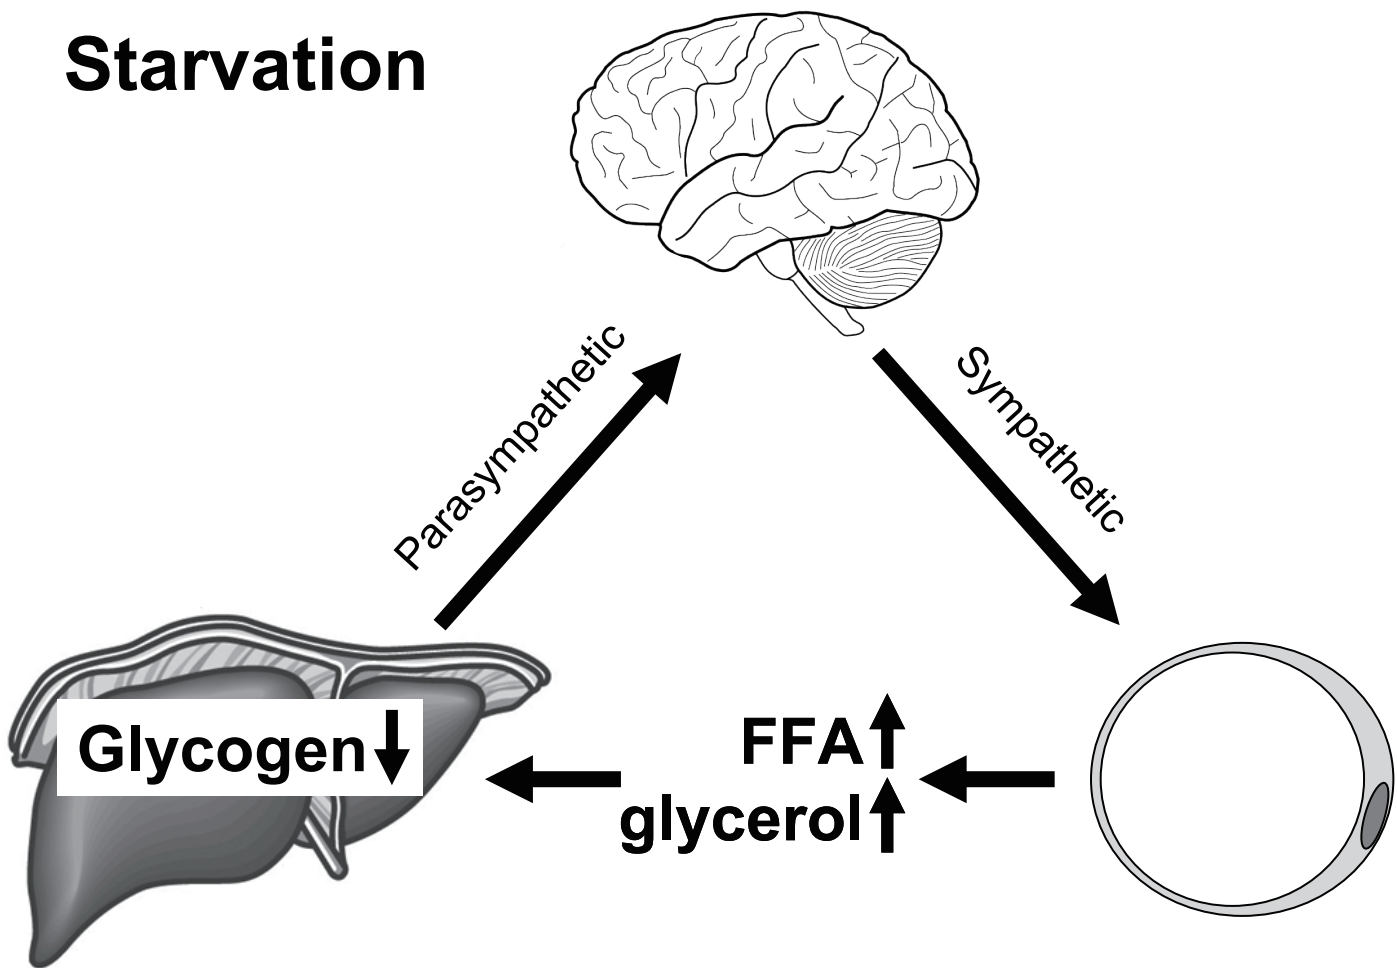

Supplementary Figure S1.

#### Graphical abstract.

Liver glycogen shortage activates a liver-brain-adipose neural axis composed of afferent vagal and efferent sympathetic nerves, promoting fatty acid and glycerol release from white adipose tissue as a response to starvation.

## Supplementary Figure S2.

a

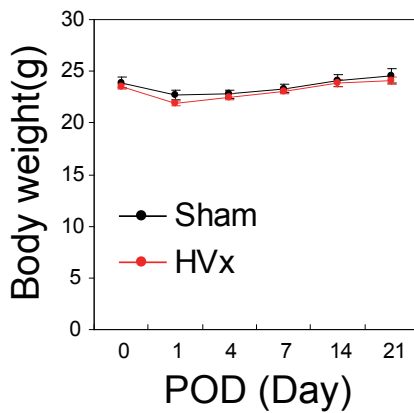

No significant difference vs Sham

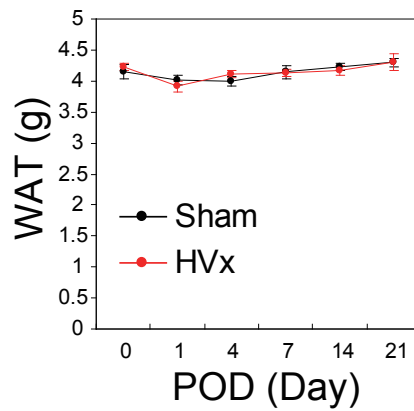

No significant difference vs Sham

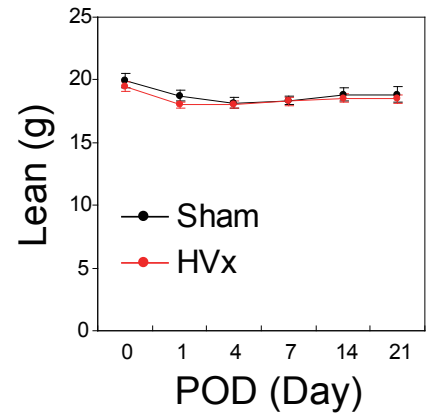

No significant difference vs Sham

b

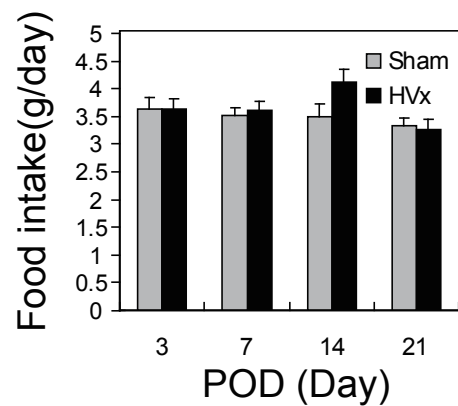

No significant difference vs Sham

Supplementary Figure S2.

**Hepatic vagotomy does not affect post-operated body weight, epididymal fat weight and lean body weight and the amount of food intake.**

a, Sequential body weight, epididymal fat weight and lean body weight were measured by dual energy X-ray analysis (DEXA). No significant difference. Error bars, S.E.M. (n=7) b, The amount of food consumption was measured after hepatic vagus nerve resection (HVx). No significant difference. Error bars, S.E.M. (n=7)

## Supplementary figure S3.

a

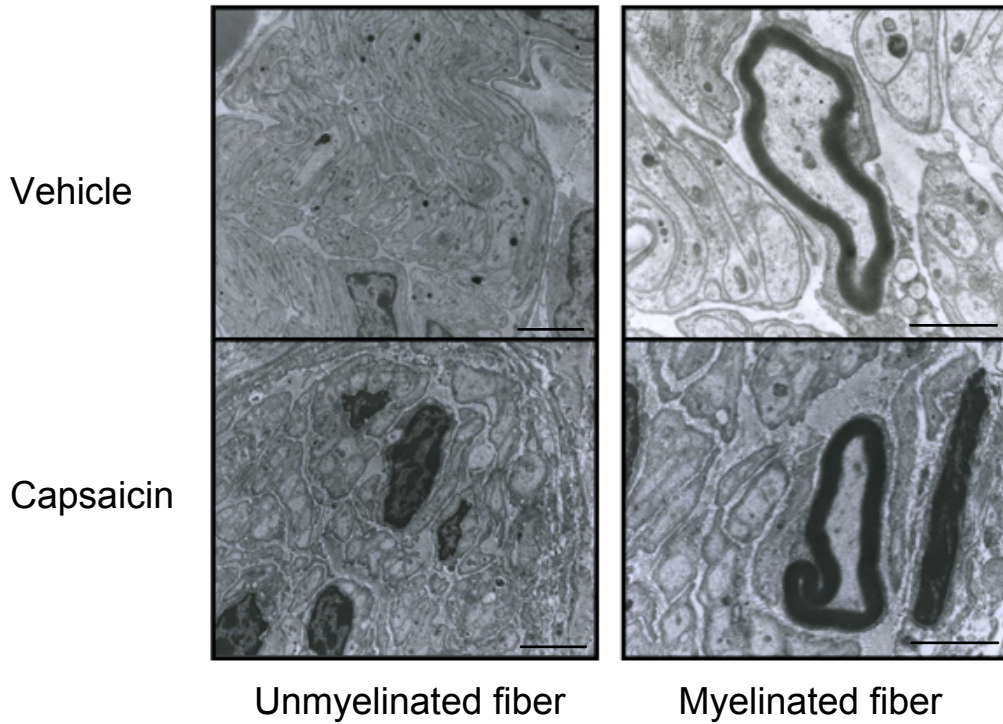

b

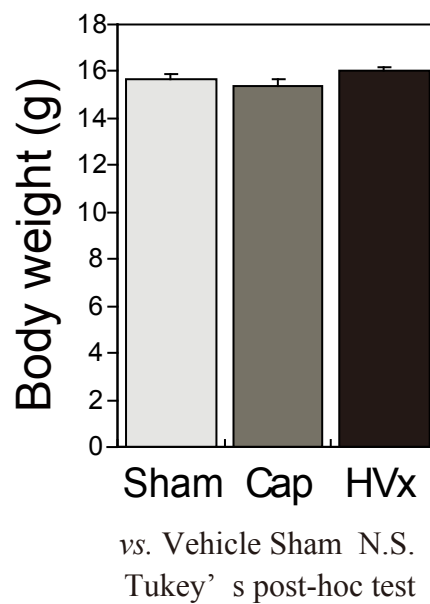

Supplementary Figure S3.

### Effect of neural circuit blockade with hepatic vagotomy or capsaicin.

**a**, Trans Emission Microscopy (TEM) appearance of vehicle or capsaicin treated hepatic vagus nerve. Upper, vehicle treated; lower, capsaicin treated group. Left, unmyelinated fiber x5000, Bar 10 $\mu$ m; right, myelinated fiber x10000, Bar 2 $\mu$ m. **b**, Body weight of sham operated (Sham), capsaicin treated (CAP), or vagotomized (HVx) mice. Statistical comparisons were made by Tukey's post-hoc test. No significant difference. Error bars, S.E.M. (n=4-12)

# Supplementary Figure S4.

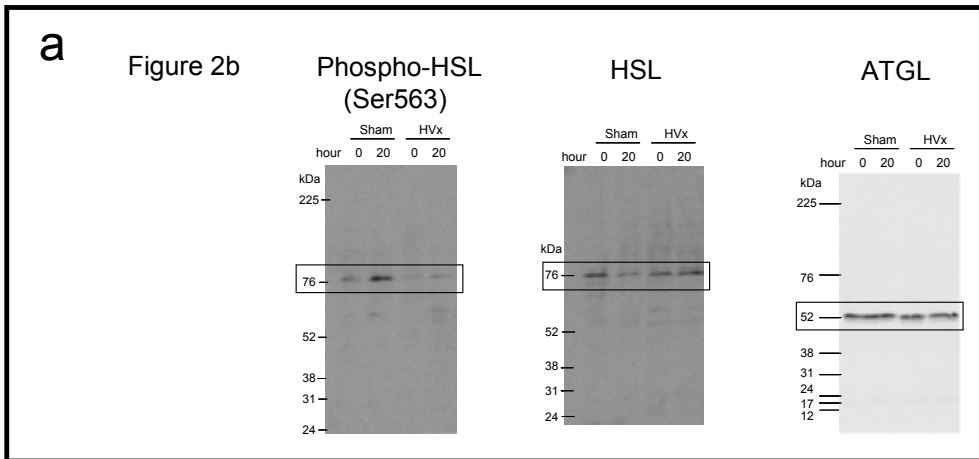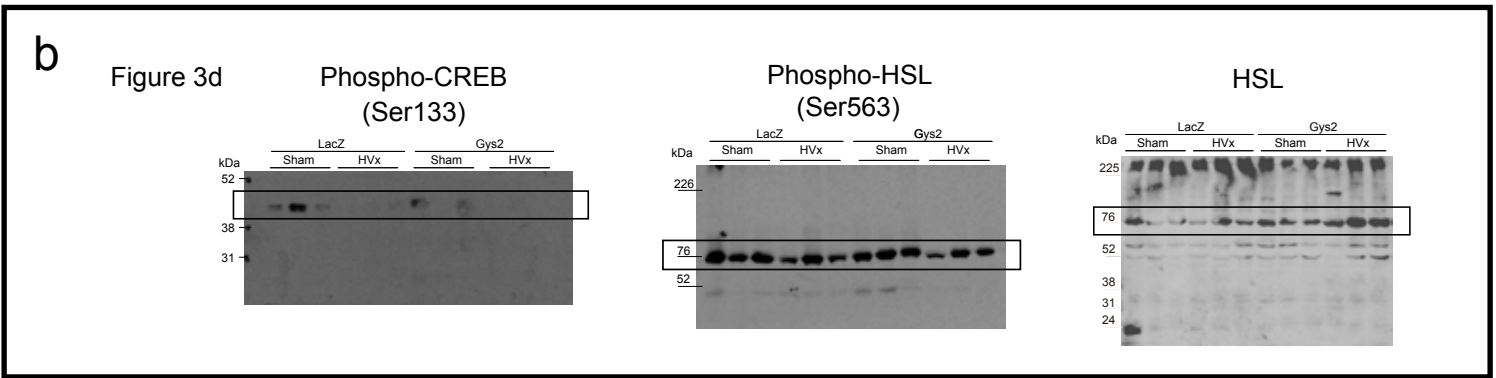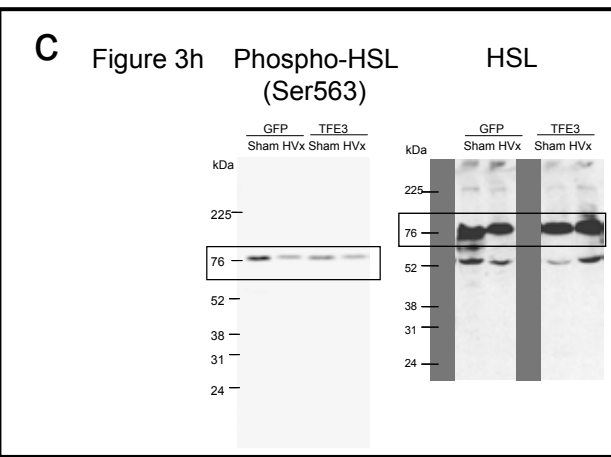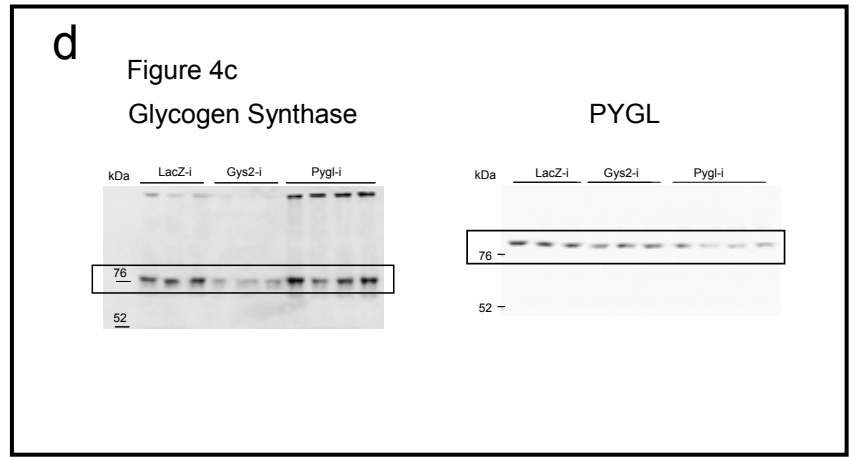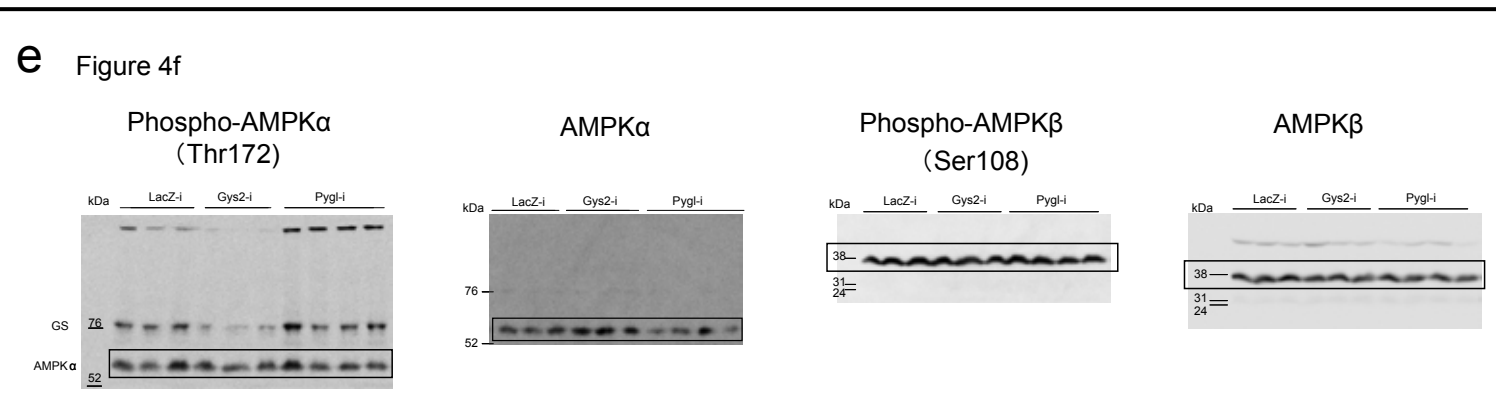

Supplementary Figure S4. Full length images of immunoblotting.

## Supplementary Figure S5.

a

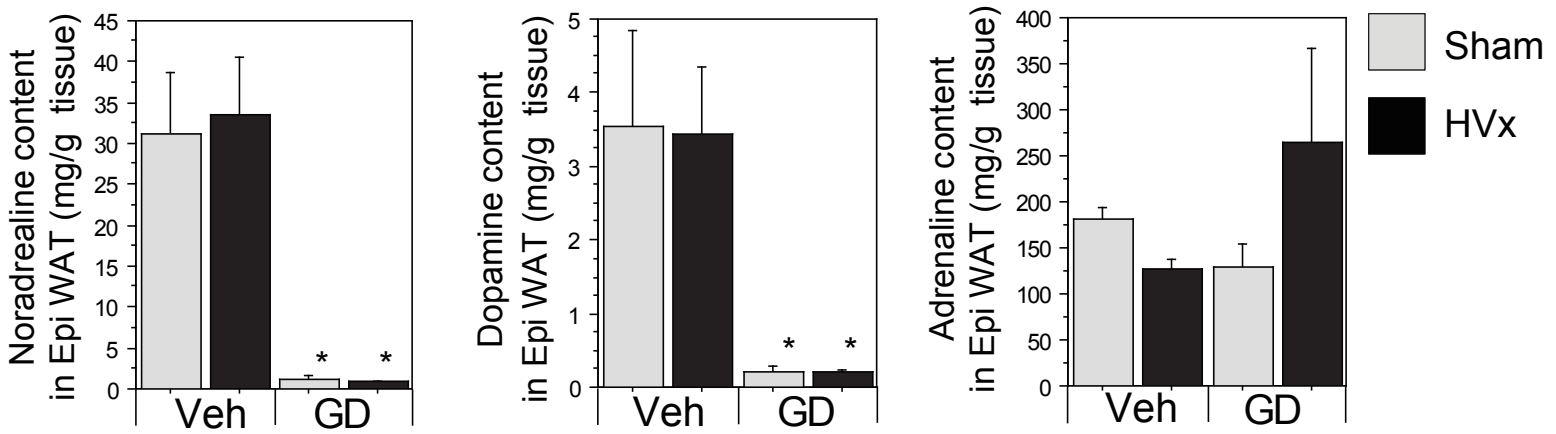

vs. Vehicle Sham \*  $p < 0.05$   
Tukey' s post-hoc test

b

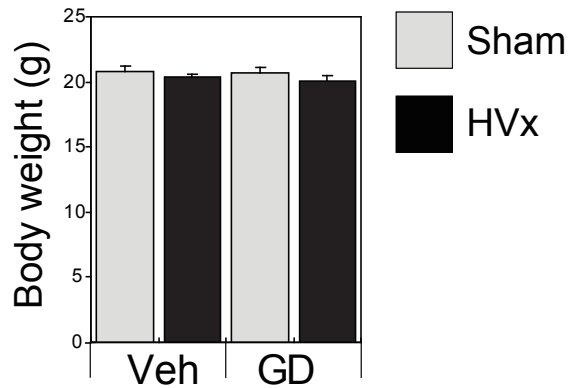

vs. Vehicle Sham N.S.  
Tukey' s post-hoc test

Supplementary Figure S5.

### Effect of sympathetic neural circuit blockade on epididymal fat tissue.

**a**, Catecholamine content of epididymal white adipose tissue in mice, either sham or hepatic vagotomized model ablated with sympathetic nerve neurotoxin guanethidine (GD) or vehicle administration (Veh). **b**, Body weight of sham and hepatic vagotomized mice administrated with vehicle or guanethidine. \* $p < 0.05$  by Tukey' s post-hoc test. Error bars, S.E.M. (n=5)

## Supplementary Figure S6.

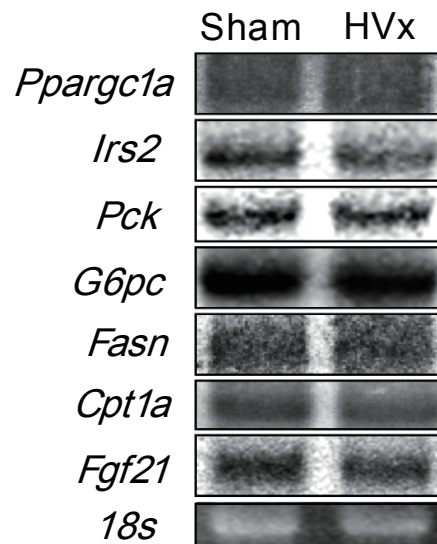

Supplementary Figure S6.

### **Liver mRNA expression after selective hepatic vagotomy**

Effects of hepatic-vagotomy on hepatic gene expression was analyzed by northern blotting of livers in hepatic-vagotomized mice after 24h fasting (pooled individual three samples).

# Supplementary Figure S7.

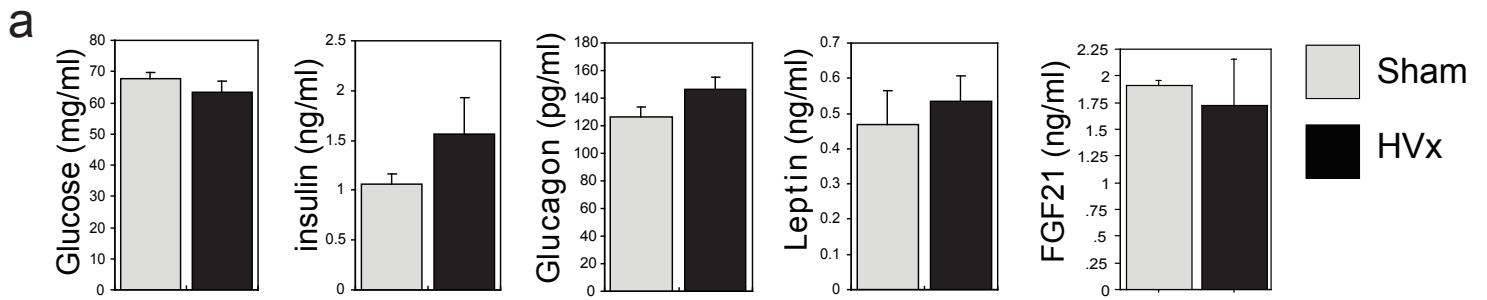

vs. Sham N.S. Student's t-test

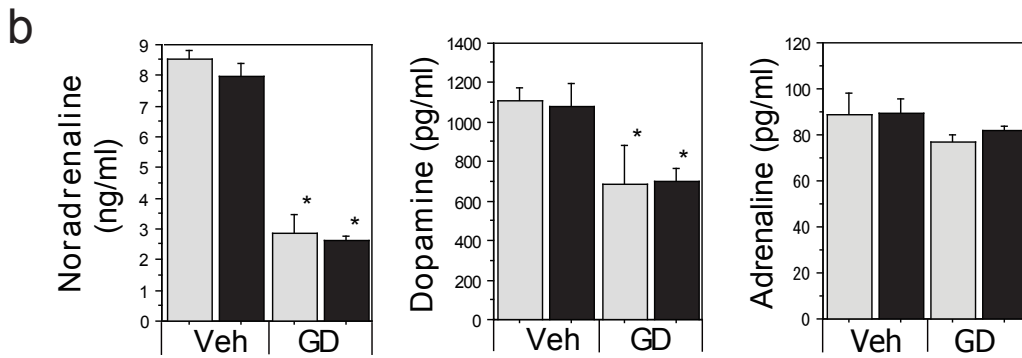

vs. Vehicle Sham \*  $p < 0.05$  Tukey's post-hoc test

Supplementary Figure S7.

## Plasma hormone profiles in the experimental mice.

**a**, Plasma glucagon, leptin, and FGF21 levels in hepatic vagus nerve transected mice fasted for 24 hours. **b**, Plasma catecholamine levels in vagotomized mice with or without guanethidine treatment on a 24-hour fasting condition. \* $p < 0.05$  by Tukey's post-hoc test. Error bars, S.E.M. (n=4-6)



## Supplementary Figure S 8.

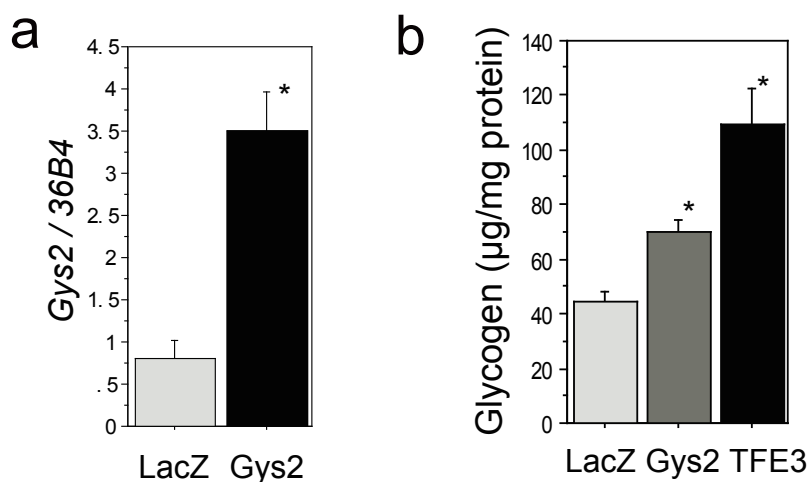

vs. LacZ

\*  $p < 0.05$  Tukey's post-hoc test

Supplementary Figure S8.

### Effect of glycogen accumulation in primary isolated hepatocytes infected with Ad-CMV-Gys2 or Ad-CMV-TFE3 *in vitro*.

**a**, Primary hepatocytes, isolated from wild mouse were infected with adenovirus vectors, at titer of  $5 \times 10^9$  pfu expressing *LacZ*, *Gys2* or *TFE3*. *Gys2* mRNA steady state levels were assessed by qRT-PCR analysis and quantified by densitometric measurement using 36B4 mRNA as a reference. There was an *Gys2* dose-dependent increase in Ad-CMV-*Gys2* transduced livers. **b**, Glycogen content in primary hepatocytes infected with Ad-*LacZ*, Ad-*Gys2*, or Ad-*TFE3*. \* $p < 0.05$  by Tukey's post-hoc test. Error bars, S.E.M. (n=4)

## Supplementary Table S1 .

|                 | Sham     |          | HVx      |          |                    |
|-----------------|----------|----------|----------|----------|--------------------|
|                 | LacZ     | Gys2     | LacZ     | Gys2     |                    |
| Body Weight (g) | 18.9±1.0 | 20.7±0.7 | 20.8±0.3 | 20.2±0.3 | n.s. vs. LacZ-Sham |

|                 | Sham     |          | HVx      |          |                      |
|-----------------|----------|----------|----------|----------|----------------------|
|                 | LacZ-i   | Gys2-i   | LacZ-i   | Gys2-i   |                      |
| Body Weight (g) | 19.4±0.3 | 18.3±0.5 | 20.2±0.4 | 19.9±0.4 | n.s. vs. LacZ-i-Sham |

|                 | Sham     |          | HVx      |          |                      |
|-----------------|----------|----------|----------|----------|----------------------|
|                 | LacZ-i   | Pygl-i   | LacZ-i   | Pygl-i   |                      |
| Body Weight (g) | 19.4±0.3 | 20.4±0.3 | 20.2±0.4 | 20.5±0.3 | n.s. vs. LacZ-i-Sham |

Supplementary Table S1.

**Body weight change after administration of adenovirus vectors overexpressing *Gys2* or those expressing short-hairpin RNA targeted for *Gys2* or *Pygl* .**

Body weight change after 24 hour fasting. v.s. each sham-control vectors. Tukey's post-hoc test.

No significant difference. Mean± S.E.M. (n=4)

## Supplementary Table S2.

### Northern blot reference set

| <i>Probe</i>    | <i>Sequence</i>         |
|-----------------|-------------------------|
| <i>Gys2</i>     | NM_145572.2:1669-2252   |
| <i>Tcfe3</i>    | NM_172472: 911-3266     |
| <i>Ppargc1a</i> | NM_008904: 140-2533     |
| <i>Irs2</i>     | NM_001081212: 1971-3442 |
| <i>Pck1</i>     | NM_011044: 126-523      |
| <i>G6pc</i>     | U00445: 25-1169         |
| <i>Fasn</i>     | NM_007988: 6189-7453    |
| <i>Cpt1a</i>    | NM_013495: 1859-2358    |
| <i>Fgf21</i>    | NM_020013: 185-817      |

Supplementary Table S2.

List of cDNA probes used for Northern blotting.

## Supplementary Table S3.

|                    | <i>Sequences of qPCR Primers</i>                                  |
|--------------------|-------------------------------------------------------------------|
| <i>Srebf1c</i>     | 5'-CGGCGCGGAAGCTGT-3'<br>5'-TGCAATCCATGGCTCCGT-3'                 |
| <i>Lipe (HSL)</i>  | 5'-TGGTTCAACTGGAGAGCGGAT-3'<br>5'-TGATGCAGAGATTCCCACCTG-3'        |
| <i>Atgl</i>        | 5'-AACACCAGCATCCAGTTCAA-3'<br>5'-GGTTCAGTAGGCCATTCCTC-3'          |
| <i>Pdk4</i>        | 5'-AGAAGACCAGAAAGCCCTGTCA-3'<br>5'-GCCATTGTAGGGACCACATTATG-3'     |
| <i>Gys2</i>        | 5'-GGAAGAAACTCTATGACGGGTTATT-3'<br>5'-TCATCGATCATATTGTGAGTGGTC-3' |
| <i>Pygl</i>        | 5'-GCACTACTACGACAAGTGTCCC-3'<br>5'-TAAATGGCCTCATCGCAG-3'          |
| <i>Cpt1a</i>       | 5'-CCTGGGCATGATTGCAAAG-3'<br>5'-GGACGCCACTCACGATGTT-3'            |
| <i>Rplp0(36B4)</i> | 5'-GAAGACAGGGCGACCTGGAA -3'<br>5'-TTGTCTGCTCCCACAATGAAGC-3'       |

Supplementary Table S3.

List of primer sets used for Q-RT PCR.

## Supplementary Table S4.

| <i>Antibody</i>                          | <i>Company, Cat. Number</i>     | <i>Dilution</i> |
|------------------------------------------|---------------------------------|-----------------|
| Phospho-AMPK $\alpha$ (Thr172) Antibody  | Cell Signaling technology #2535 | x1000           |
| AMPK $\alpha$ Antibody                   | Cell Signaling technology #2603 | x1000           |
| Phospho-AMPK $\beta$ 1 (Ser108) Antibody | Cell Signaling technology #4181 | x1000           |
| AMPK $\beta$ 1/2 Antibody                | Cell Signaling technology #4150 | x1000           |
| HSL Antibody                             | Cell Signaling technology #4107 | x1000           |
| Phospho-HSL (Ser563) Antibody            | Cell Signaling technology #4139 | x1000           |
| ATGL Antibody                            | Cell Signaling technology #2138 | x1000           |
| Phospho-CREB (Ser133) Antibody           | Cell Signaling technology #9198 | x250            |
| Glycogen Synthase Antibody               | Cell Signaling technology #3893 | x1000           |
| PYGB/L/M Antibody                        | Santa Cruz technology sc-46347  | x1000           |

Supplementary Table S4.

List of Antibodies used for immunoblotting

## Supplementary Methods

***Transmission electron microscopic analyses of vagal nerves*** — Seven days after perivagal treatment with capsaicin or vehicle, nerves were fixed in 2.5% glutaraldehyde in 0.1M sodium cacodylate buffer (pH 7.4), and postfixed in 1% osmium tetroxide. They were dehydrated in graded alcohols and embedded in Epon812. Ultrathin sections were stained with uranyl acetate and lead, and then examined under a transmission electron microscope (H-7600, Hitachi, Tokyo, Japan).

***Metabolic measurements*** — Epinephrine, norepinephrine and dopamine were measured in plasma using a LaChrom Elite® HPLC system (Hitachi, Tokyo, Japan) according to the manufacturer's instructions.

***Isolation and culture of primary hepatocytes and glycogen synthesis*** — We prepared primary cultures of mouse hepatocytes and subjected them to adenovirus infection as previously described <sup>5</sup>. Briefly, primary hepatocytes were isolated from 7-week-old male ICR mouse (CLEA, Tokyo, Japan). Cells were resuspended in William's E medium containing 100 nM insulin and 10 nM dexamethasone on 100-mm collagen-coated dishes at a final density of  $8 \times 10^6$  cells. After incubation for 20 h to allow attachment, the medium was replaced with high glucose DMEM with 100 nM insulin containing each 5 MOI adenovirus. Using mouse hepatocytes, studies of glycogen synthesis, gene expression and immunoblotting were performed as described previously <sup>5</sup>. Briefly, Glycogen storage in hepatocytes were determined after washing the cells twice with ice-cold saline and by using amyloglucosidase digestion and subsequent glucose measurement. For RNA analysis, we incubated cells at 37 °C for 48 h after adenovirus infection at 5 MOI. For protein analysis, we stimulated adenovirus-infected cells with 100 nM insulin after a 48-h incubation.

***Assessment of sympathetic activity by measurement of catecholamine content after blockade of the sympathetic nervous system*** — Measurement of catecholamine content in tissues was according to previously published methods <sup>17</sup>. Briefly, epididymal white adipose tissue (WAT) was removed and frozen. Free catecholamines were extracted from WAT as follows: 100 mg WAT was homogenized on ice in 3 ml of 0.4 N perchloric acid with 0.2% EDTA-2Na and 0.002% L- ascorbic acid. Homogenized samples were centrifuged at 3500 r.p.m. for 20 min on ice, and the supernatant was used. The concentration of catecholamines was determined using a

LaChrom Elite® HPLC system (Hitachi, Tokyo, Japan) with electrochemical detection.

## Supplementary References

5. Nakagawa, Y. et al. TFE3 transcriptionally activates hepatic IRS-2, participates in insulin signaling and ameliorates diabetes. *Nat Med* **12**, 107-13 (2006).
  
17. King, V. L. et al. Cold exposure regulates the norepinephrine uptake transporter in rat brown adipose tissue. *Am J Physiol* **276**, R143-R151 (1999).
